# Supplementary material for: π–π stacking: a strategy to improve the electron mobilities of bipolar hosts for TADF and phosphorescent devices with low efficiency roll-off
Source: Royal Society of Chemistry journal article supplement (doi:10.1039/c7tc00733g), 2017-01-01
Supplement: c7tc00733g1.pdf [file c7tc00733g1.pdf]

## Electronic Supplementary Information

### **$\pi$ - $\pi$ stacking: a strategy to improve the electron mobilities of bipolar hosts for TADF and phosphorescent devices with low efficiency roll-off**

Minghan Cai,<sup>a</sup> Xiaozeng Song,<sup>a</sup> Dongdong Zhang,<sup>a</sup> Juan Qiao,<sup>a</sup> and Lian Duan<sup>\*a</sup>

Key Lab of Organic Optoelectronics and Molecular Engineering of Ministry of Education, Department of  
Chemistry, Tsinghua University, Beijing 100084, China.

\* Correspondence to: E-mail address: [duanl@mail.tsinghua.edu.cn](mailto:duanl@mail.tsinghua.edu.cn); Fax: +86-10-62795137; Tel: +86-10-

62782197.

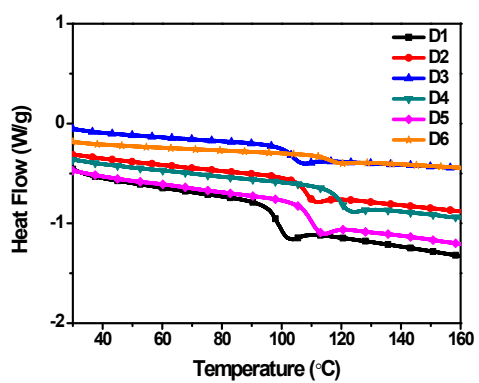

Figure S1. Differential scanning calorimetry (DSC) spectra of D1-D6.

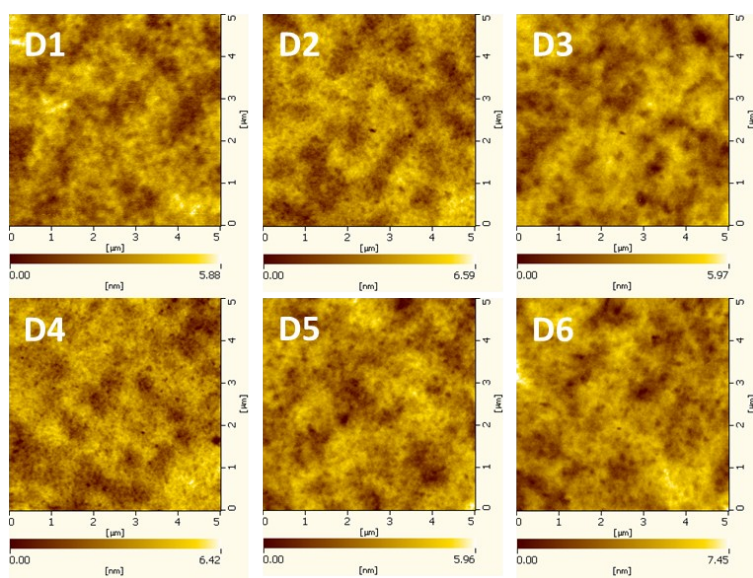

Figure S2. Atomic force microscopy (AFM) images of D1-D6 films.

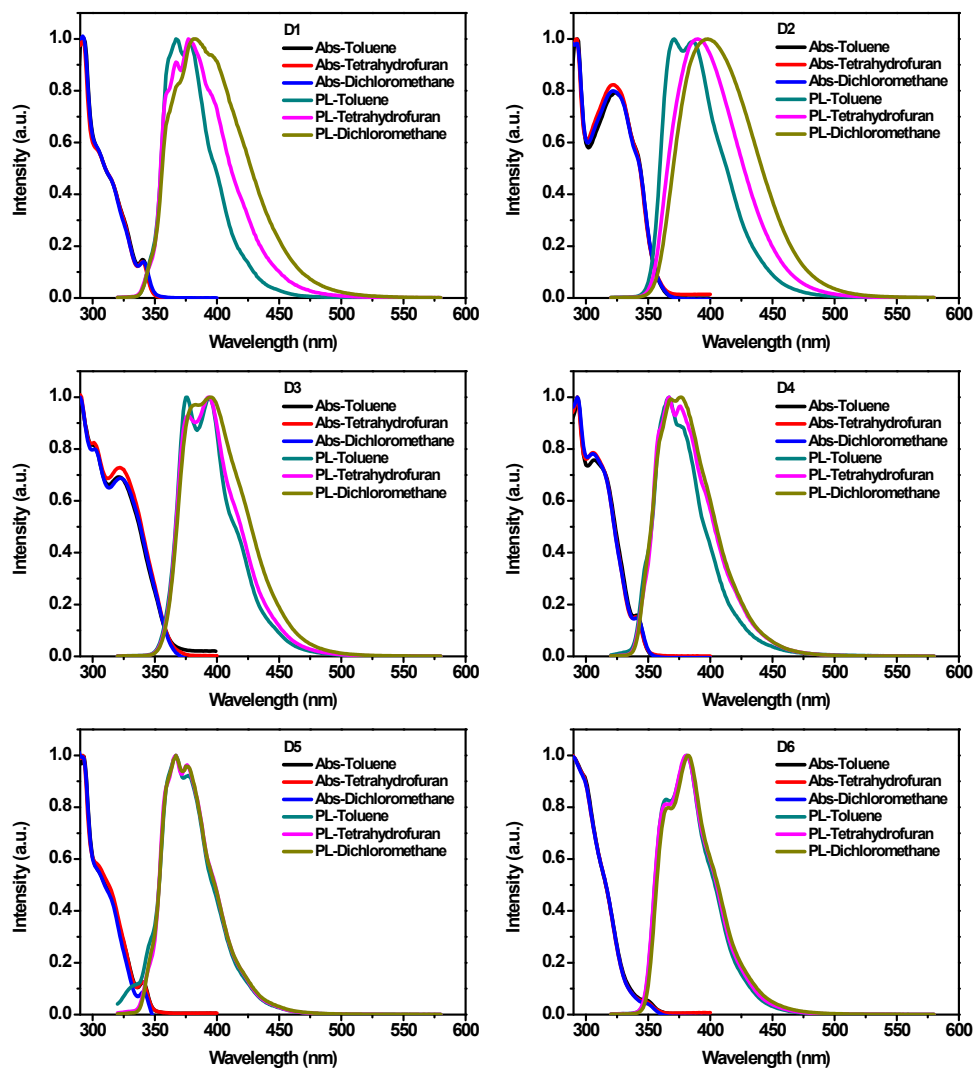

Figure S3. UV/Vis absorption and PL spectra of D1-D6 in different solvents ( $1 \times 10^{-5}$  mol L<sup>-1</sup>) for comparison.

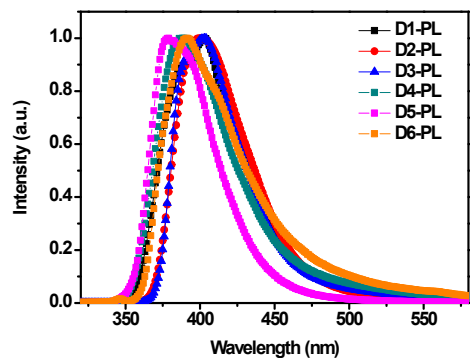

Figure S4. PL spectra of D1-D6 films.

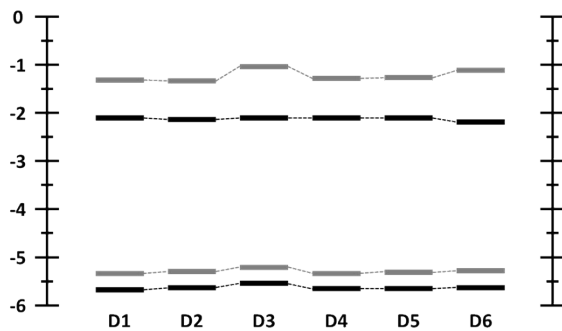

Figure S5. Comparison of calculated HOMO and LUMO energy levels (gray) with the experimental energy levels (black) of D1-D6.

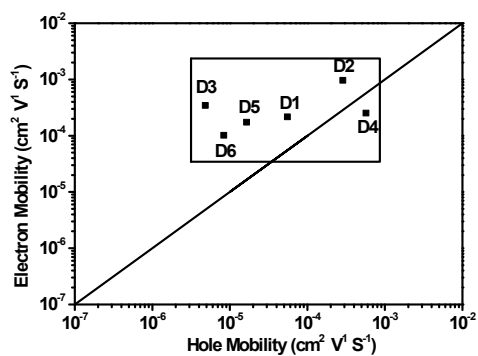

Figure S6. Charge mobilities of D1-D6 at the electric field of  $6 \times 10^7 \text{ V m}^{-1}$ .

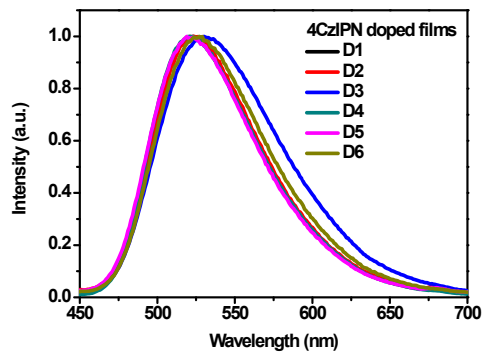

Figure S7. PL spectra of 10 wt% 4CzIPN doped D1-D6 films.

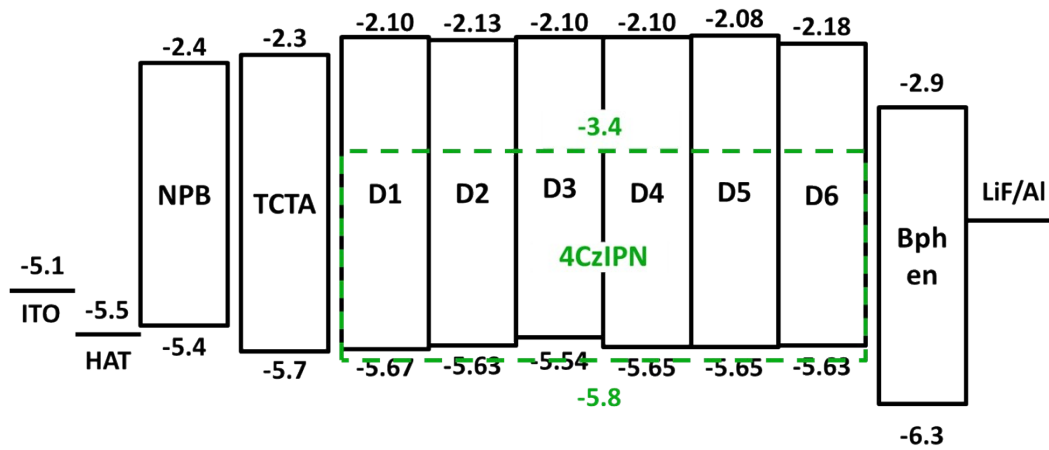

Figure S8. Energy diagrams of green TADF OLEDs.

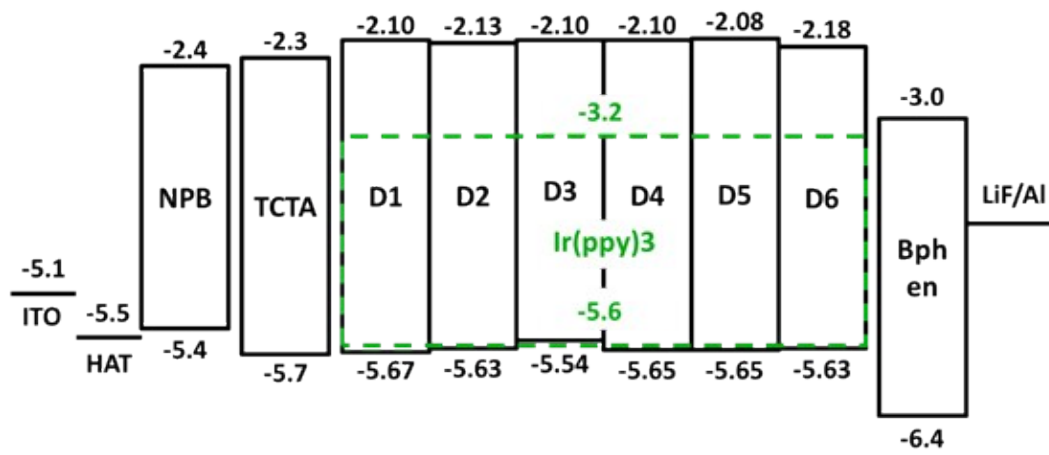

Figure S9. Energy diagrams of green PHOLEDs.

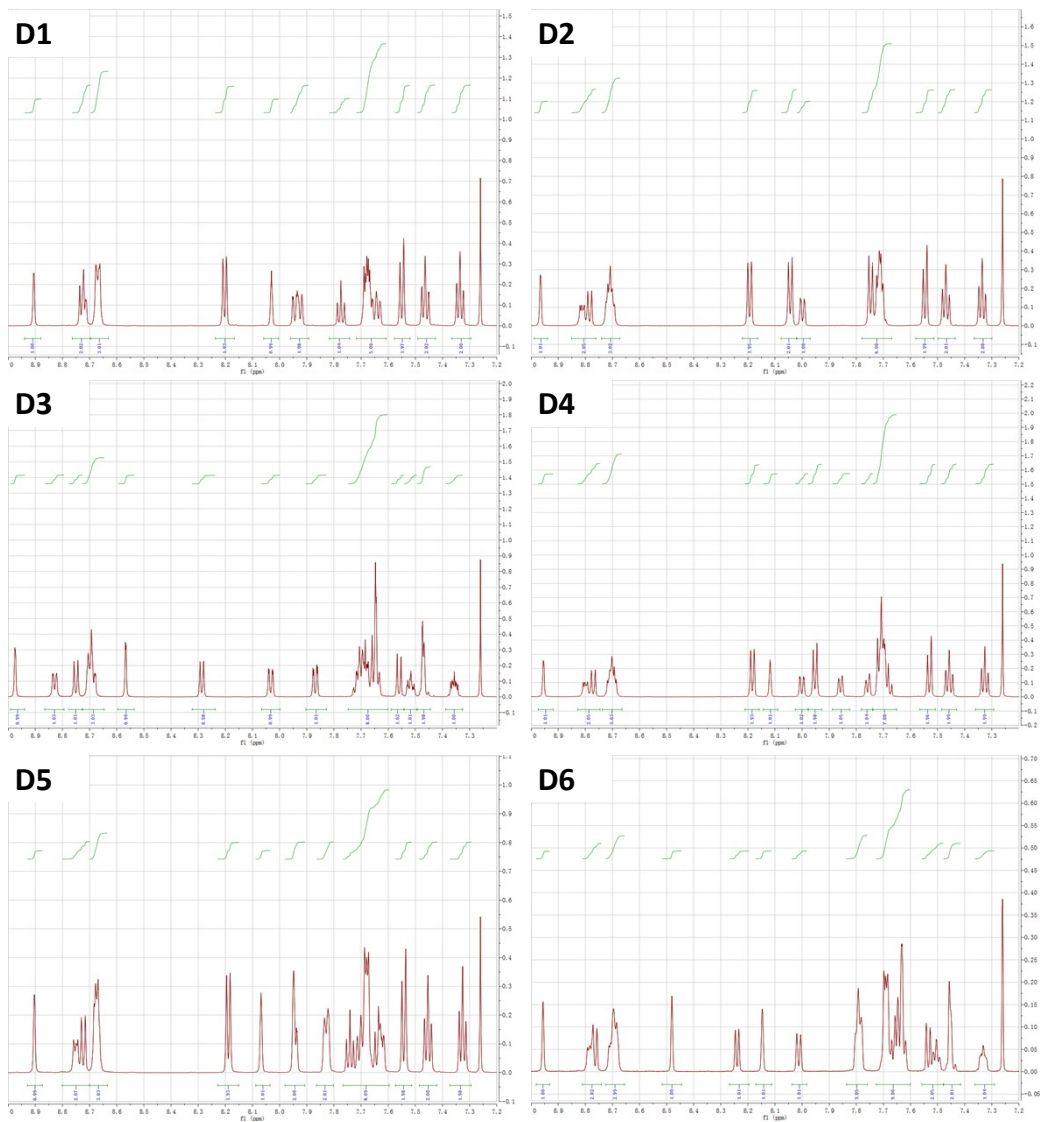

Figure S10. <sup>1</sup>H NMR spectra of D1-D6.

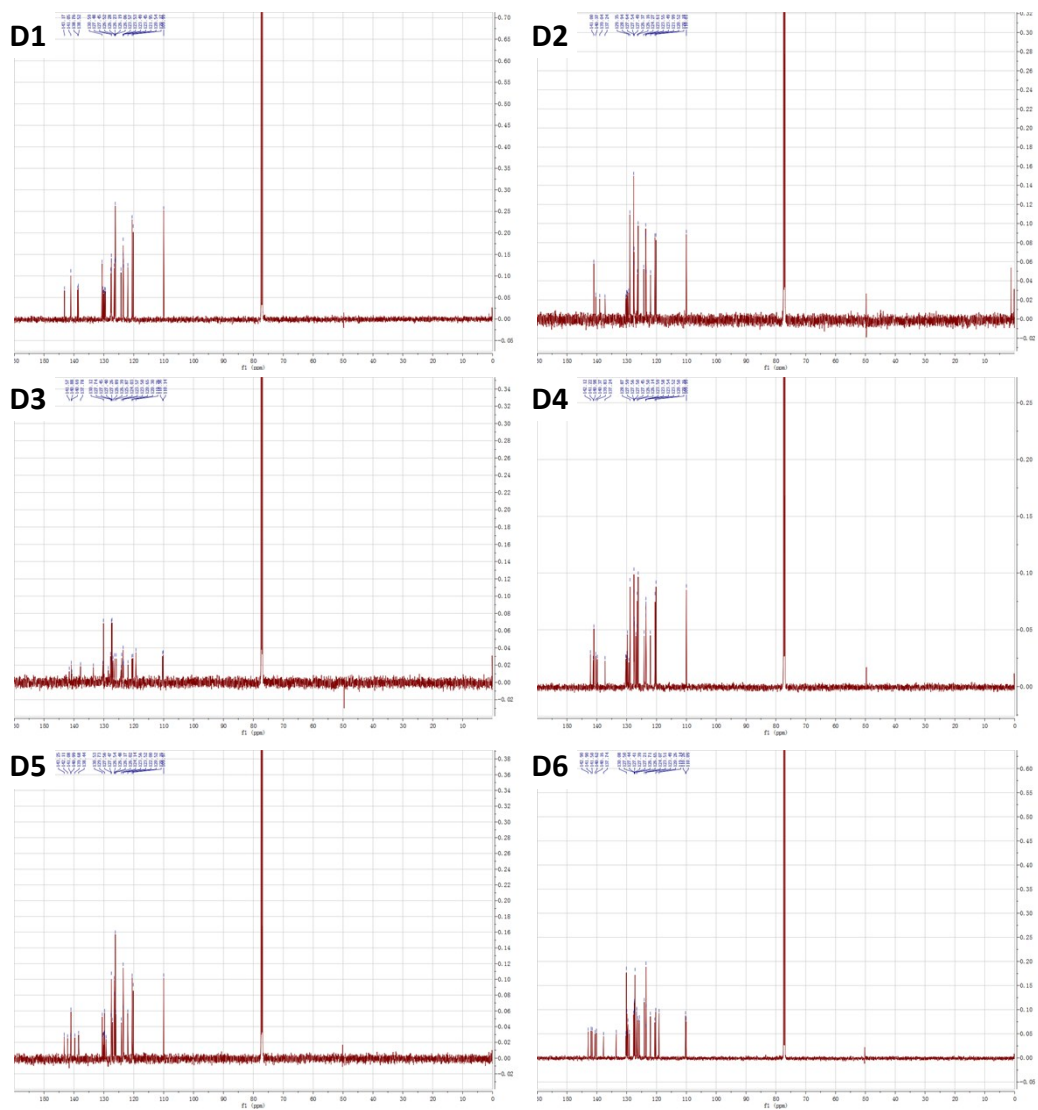

Figure S11.  $^{13}\text{C}$  NMR spectra of D1-D6.

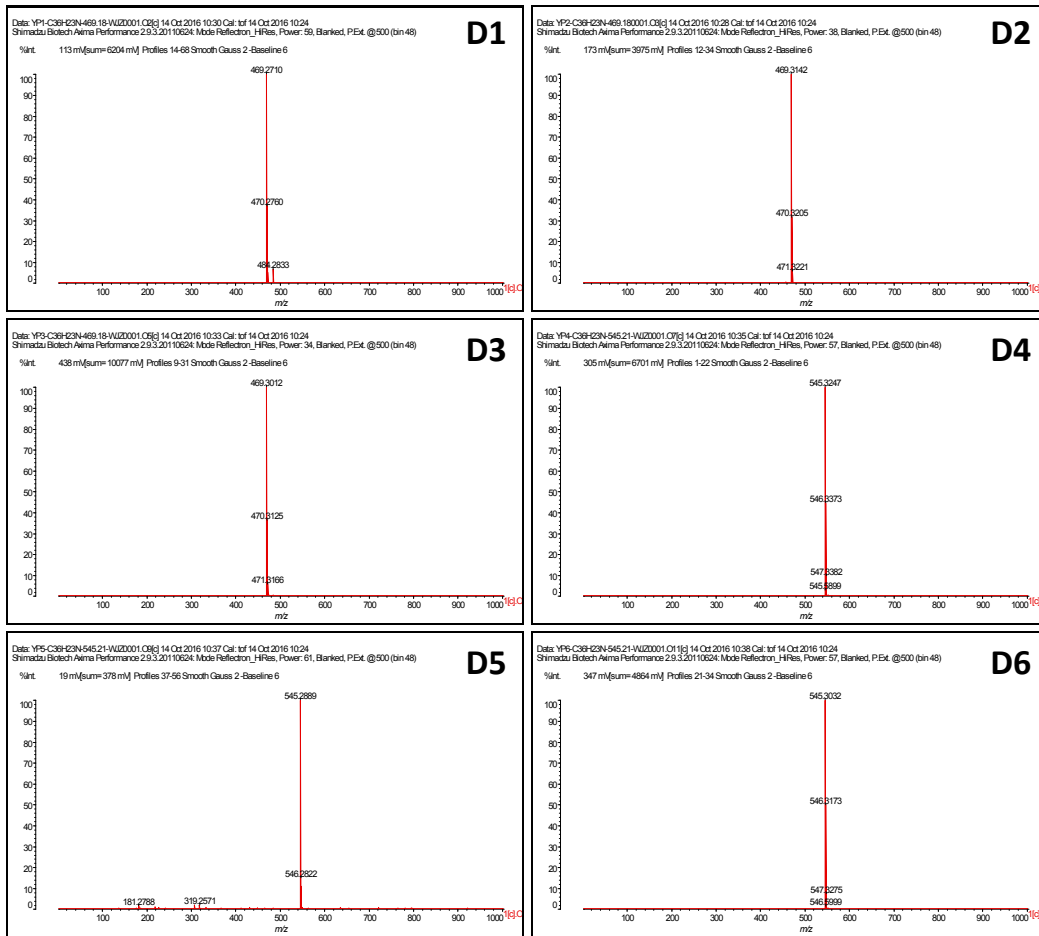

Figure S12. MALDI-TOF MS of D1-D6.
